# Supplementary material for: A two-dimensional ferroelectric ferromagnetic half semiconductor in a VOF monolayer
Source: Royal Society of Chemistry journal article supplement (doi:10.1039/d1tc02238e), 2021-01-01
Supplement: d1tc02238e1.pdf [file d1tc02238e1.pdf]

## Two-dimensional Ferroelectric Ferromagnetic Half Semiconductor in VOF monolayer

Shaowen Xu<sup>a</sup>, Fanhao Jia<sup>a</sup>, Guodong Zhao<sup>a</sup>, Wei Wu<sup>a</sup>, and Wei Ren<sup>a†</sup>

<sup>1</sup>Physics Department, Shanghai Key Laboratory of High Temperature Superconductors, State Key Laboratory of Advanced Special Steel, International Centre of Quantum and Molecular Structures, Shanghai University, Shanghai 200444, China

<sup>†</sup>[renwei@shu.edu.cn](mailto:renwei@shu.edu.cn)

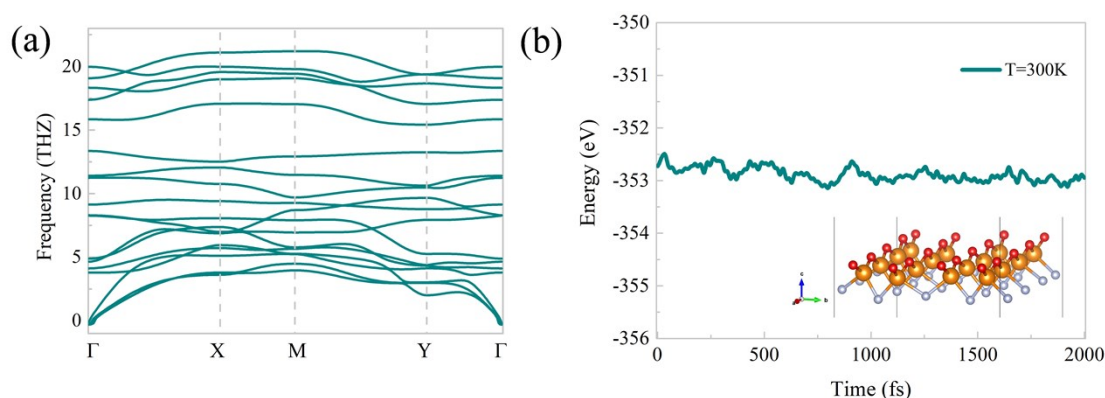

**Figure S1** (a) The phonon spectra of the VOF monolayer. (b) The evolution of energy over time at T=300 K from molecular dynamics simulations of VOF monolayer.

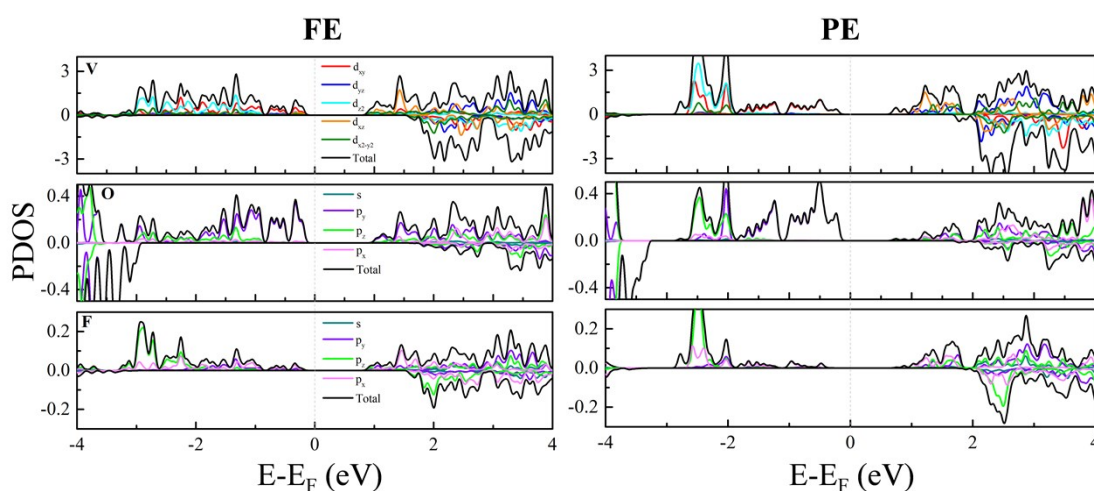

**Figure S2.** The HSE06 partial density of states (PDOS) of ferromagnetic VOF monolayer of FE and PE states. The Fermi energy level is set to zero.

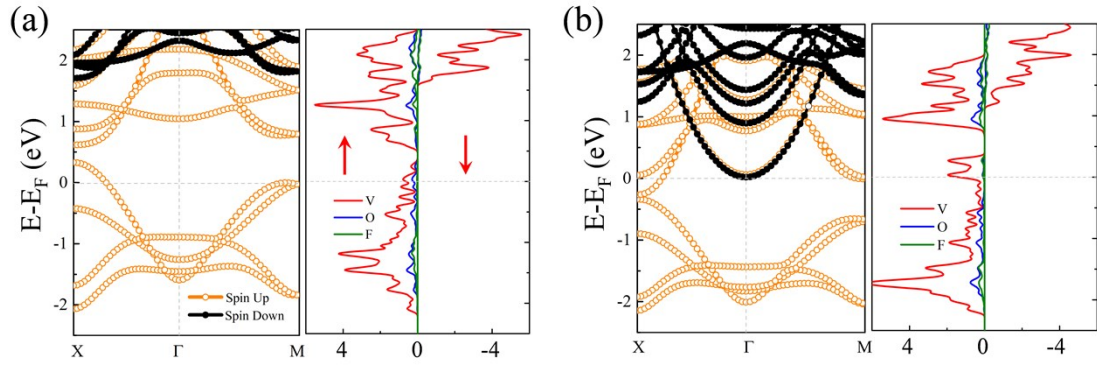

**Figure S3** The electronic structures of VOF monolayer with (a) hole and (b) electron doping density of 0.1/formula unit.

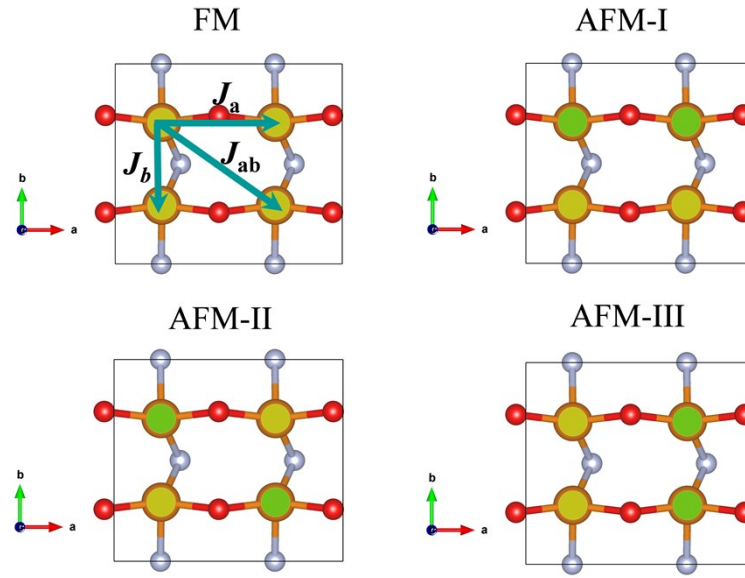

**Figure S4** Spin density distributions for the VOF monolayer under different magnetic configurations, the yellow and green balls represent the spin up and spin down states.

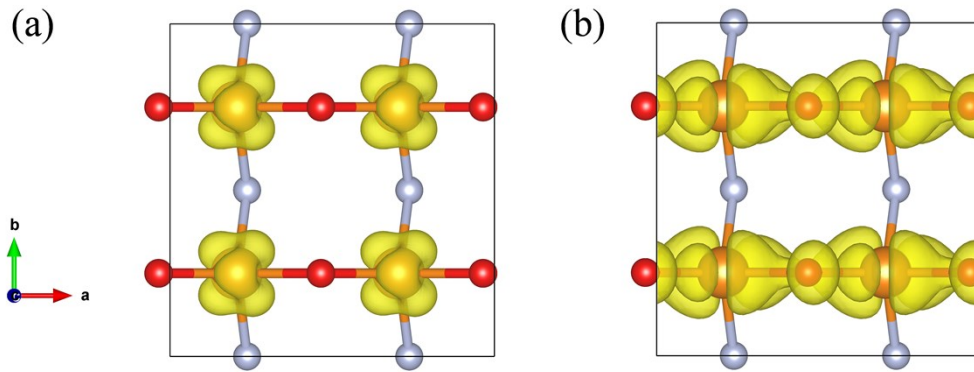

**Figure S5** (a)The spin density and (b) wavefunction of the valence band maximum at the gamma point of VOF monolayer.

**Table SI** The elastic constants (N/m) of VOF monolayer.

| $C_{11}$ | $C_{12}$ | $C_{22}$ | $C_{66}$ |
|----------|----------|----------|----------|
| 90.876   | -8.686   | 26.117   | 1.124    |

**Table SII:** The energy gap (eV), local magnetic moment per V atoms ( $\mu_B$ ) and the energy difference  $\Delta E$  (meV) between FM and AFM ( $E_{\text{FM}}-E_{\text{AFM}}$ ) of VOF monolayer calculated by HSE06 method.

| Configuration | Gap   | Type   | M     | $\Delta E$ |
|---------------|-------|--------|-------|------------|
| FM            | 1.672 | direct | 1.930 | 0          |
| AFM-I         | 2.143 | direct | 1.912 | -25.2      |
| AFM-II        | 2.959 | direct | 1.814 | -180       |
| AFM3-III      | 2.858 | direct | 1.828 | -153       |
